# Supplementary material
Source: publisher site journal article supplement (https://www.dovepress.com/article/480402)
Supplement: Supplementary file 1 [file get_supplementary_file.php]

**Supplemental Materials**

**Supplemental Tables**

**Table S1.** Input parameters utilized in PBPK modeling of anlotinib as a victim drug.

| Parameters | Value | Source |
| --- | --- | --- |
| Physicochemical |  |  |
| Molecular weight (g/mol) | 480.360 | Ref 1 |
| LogPo:wa | 3.700 |
| Compound type | Diprotic base |
| pKa 1 | 14.000 |
| pKa 2 | 9.390 |
| B/Pb | 0.790 | Ref 2 |
| fuc | 0.070 | Ref 1 |
| Absorption | ADAM |  |
| PCaco-2(x10-6 cm/s)d | 3.500 | Ref 1 |
| Solubility (mg/mL) |  |  |
| Entry 1 pH | 1.700 | Ref 1 |
| Entry 1 Solubility | 500.000 |
| Entry 2 pH | 4.600 |
| Entry 2 Solubility | 0.114 |
| Entry 3 pH | 6.500 |
| Entry 3 Solubility | 0.00089 |
| Distribution | Full PBPK Model |  |
| Kp(Adipose)e | 22.230 | Ref 1 |
| Kp(Bone) | 38.860 |
| Kp(Brain) | 1.370 | Predicted by Simcyp® |
| Kp(Gut) | 135.060 | Ref 1 |
| Kp(Heart) | 56.490 |
| Kp(Kidney) | 77.840 |
| Kp(Liver) | 55.780 |
| Kp(Lung) | 251.880 |
| Kp(Muscle) | 14.260 |
| Kp(Skin) | 3.603 | Predicted by Simcyp® |
| Kp(Spleen) | 123.390 | Ref 1 |
| Kp(Pancreas) | 96.280 |
| Elimination | Enzyme Kinetics |  |
| CLint, CYP1A2f  ISEFCYP1A2g | 0.23  0.69 | In house |
| CLint, CYP3A4  ISEFCYP3A4 | 0.32  0.49 | In house |
| CLint, CYP3A5  ISEFCYP3A5 | 0.31  0.43 | In house |

aLog Po:w: the partition coefficient in oil and water.

bB/P: blood to plasma ratio.

cfu: unbound fraction of the drug in plasma.

dPCaco-2: the apparent permeability through the Caco-2 cells.

eKp: tissue to plasma partition coefficient.

fCLint: intrinsic clearance (µL/min/pmol)

gISEF, intersystem extrapolation factor

**Table S2.** **The built-in DDI parameters of perpetrators included in the PBPK-DDI model.**

| Parameters | Strong CYP3A inhibitor | | | Moderate CYP3A inhibitor | | | Strong CYP1A2 inhibitor | | strong CYP3A and moderate CYP1A2 inducer |
| --- | --- | --- | --- | --- | --- | --- | --- | --- | --- |
| Itraconazole | Ketoconazole | Clarithromycin | Diltiazem | Erythromycin | Fluconazole | Fluvoxamine | Ciprofloxacin | Rifampicin |
| CYP1A2 Ki | - | - | - | - | - | - | 0.002 | 2 | - |
| CYP3A4 Ki | 0.0013 | 0.015 | 10 | 36.1 | 82 | 10.7 | 0.789 | 1.5 | 15 |
| CYP3A5 Ki | - | 0.109 | - | 36.1 | - | 86.4 | 5.82 | - | - |
| CYP3A4 Kapp  Kinact | - | - | 12  2.13 | 4.75  0.702 | 23.2  2.25 | - | - | - | - |
| CYP3A5 Kapp  Kinact | - | - | - | 4.75  0.702 | 7.14  0.66 | - | - | - | - |
| CYP3A4/5 Indmax^  IndC50^ | - | - | - | - | - | - | - | - | 16  0.32 |
| CYP1A/2  Indmax^IndC50^ |  |  |  |  |  |  |  |  | 2.7  0.1 |

Note: Ki (μM): concentration of inhibitor that supports half maximal inhibition;

Kapp (μM): concentration of mechanism-based inhibitor associated with half maximal inactivation rate;

Kinact (1/h): inactivation rate of the enzyme

Indmax^: maximal fold induction over vehicle

IndC50^(μM): test compound concentration that supports half maximal induction

“-” represented that no corresponding value was entered

**Table S3. Observed and predicted pharmacokinetic parameters of anlotinib in cancer patients under varying single dosing regimens.**

| Dose (mg) |  | Cmax (ng/mL) | AUC0-120h (ng·h/mL) |
| --- | --- | --- | --- |
| 5 mg  (n = 1) | Obs | 5.8 | 411 |
| Pred-by in vivo | 5.7±1.0 | 304.0±70.9 |
| Pred-by rhCYP | 5.7±1.1 | 288.7±82.7 |
| Pred-by retrograde | 5.5±1.1 | 255.7±80.7 |
| FE | 1.02 | 1.42 |
| 10 mg  (n = 4) | Obs | 5.8±2.8 | 318±133 |
| Pred-by in vivo | 11.4±2.0 | 607.0±142.4 |
| Pred-by rhCYP | 11.3±2.1 | 576.3±165.3 |
| Pred-by retrograde | 10.9±2.1 | 510.4±161.3 |
| FE | 1.95 | 1.81 |
| 12 mg  (n = 11) | Obs | 10.5±2.9 | 617±194 |
| Pred-by in vivo | 13.7±2.4 | 727.9±171.4 |
| Pred-by rhCYP | 13.5±2.6 | 691.0±198.1 |
| Pred-by retrograde | 13.1±2.5 | 612.0±193.4 |
| FE | 1.29 | 1.11 |
| 16 mg  (n = 4) | Obs | 15.8±3.2 | 894±305 |
| Pred-by in vivo | 18.3±3.2 | 969.4±228.8 |
| Pred-by rhCYP | 18.0±3.4 | 919.9±263.7 |
| Pred-by retrograde | 17.5±3.3 | 814.9±257.7 |
| FE | 1.14 | 1.02 |

**Table S4.** Pharmacokinetics of anlotinib with and without coadministration of perpetrators using rhCYPs-approach in cancer patients (default Ki values vs. experimentally obtained Ki predictions).

| **Group** | **Using default Ki values in Simcyp** | | **Using in-house Ki values** | |
| --- | --- | --- | --- | --- |
| **Cmax(ng/mL)** | **AUC(ng*h/mL)** | **Cmax(ng/mL)** | **AUC(ng*h/mL)** |
| Anlotinib | 13.43 | 1054.09 | 13.43 | 1054.09 |
| Ketoconazole+Anlotinib | 14.47 | 1486.93 | 13.96 | 1167.87 |
| Ratio | 1.08 | 1.41 | 1.03 | 1.11 |
| Clarithromycin+Anlotinib | 14.08 | 1415.48 | 14.10 | 1425.26 |
| Ratio | 1.05 | 1.34 | 1.05 | 1.35 |

**Supplemental Figures**

**
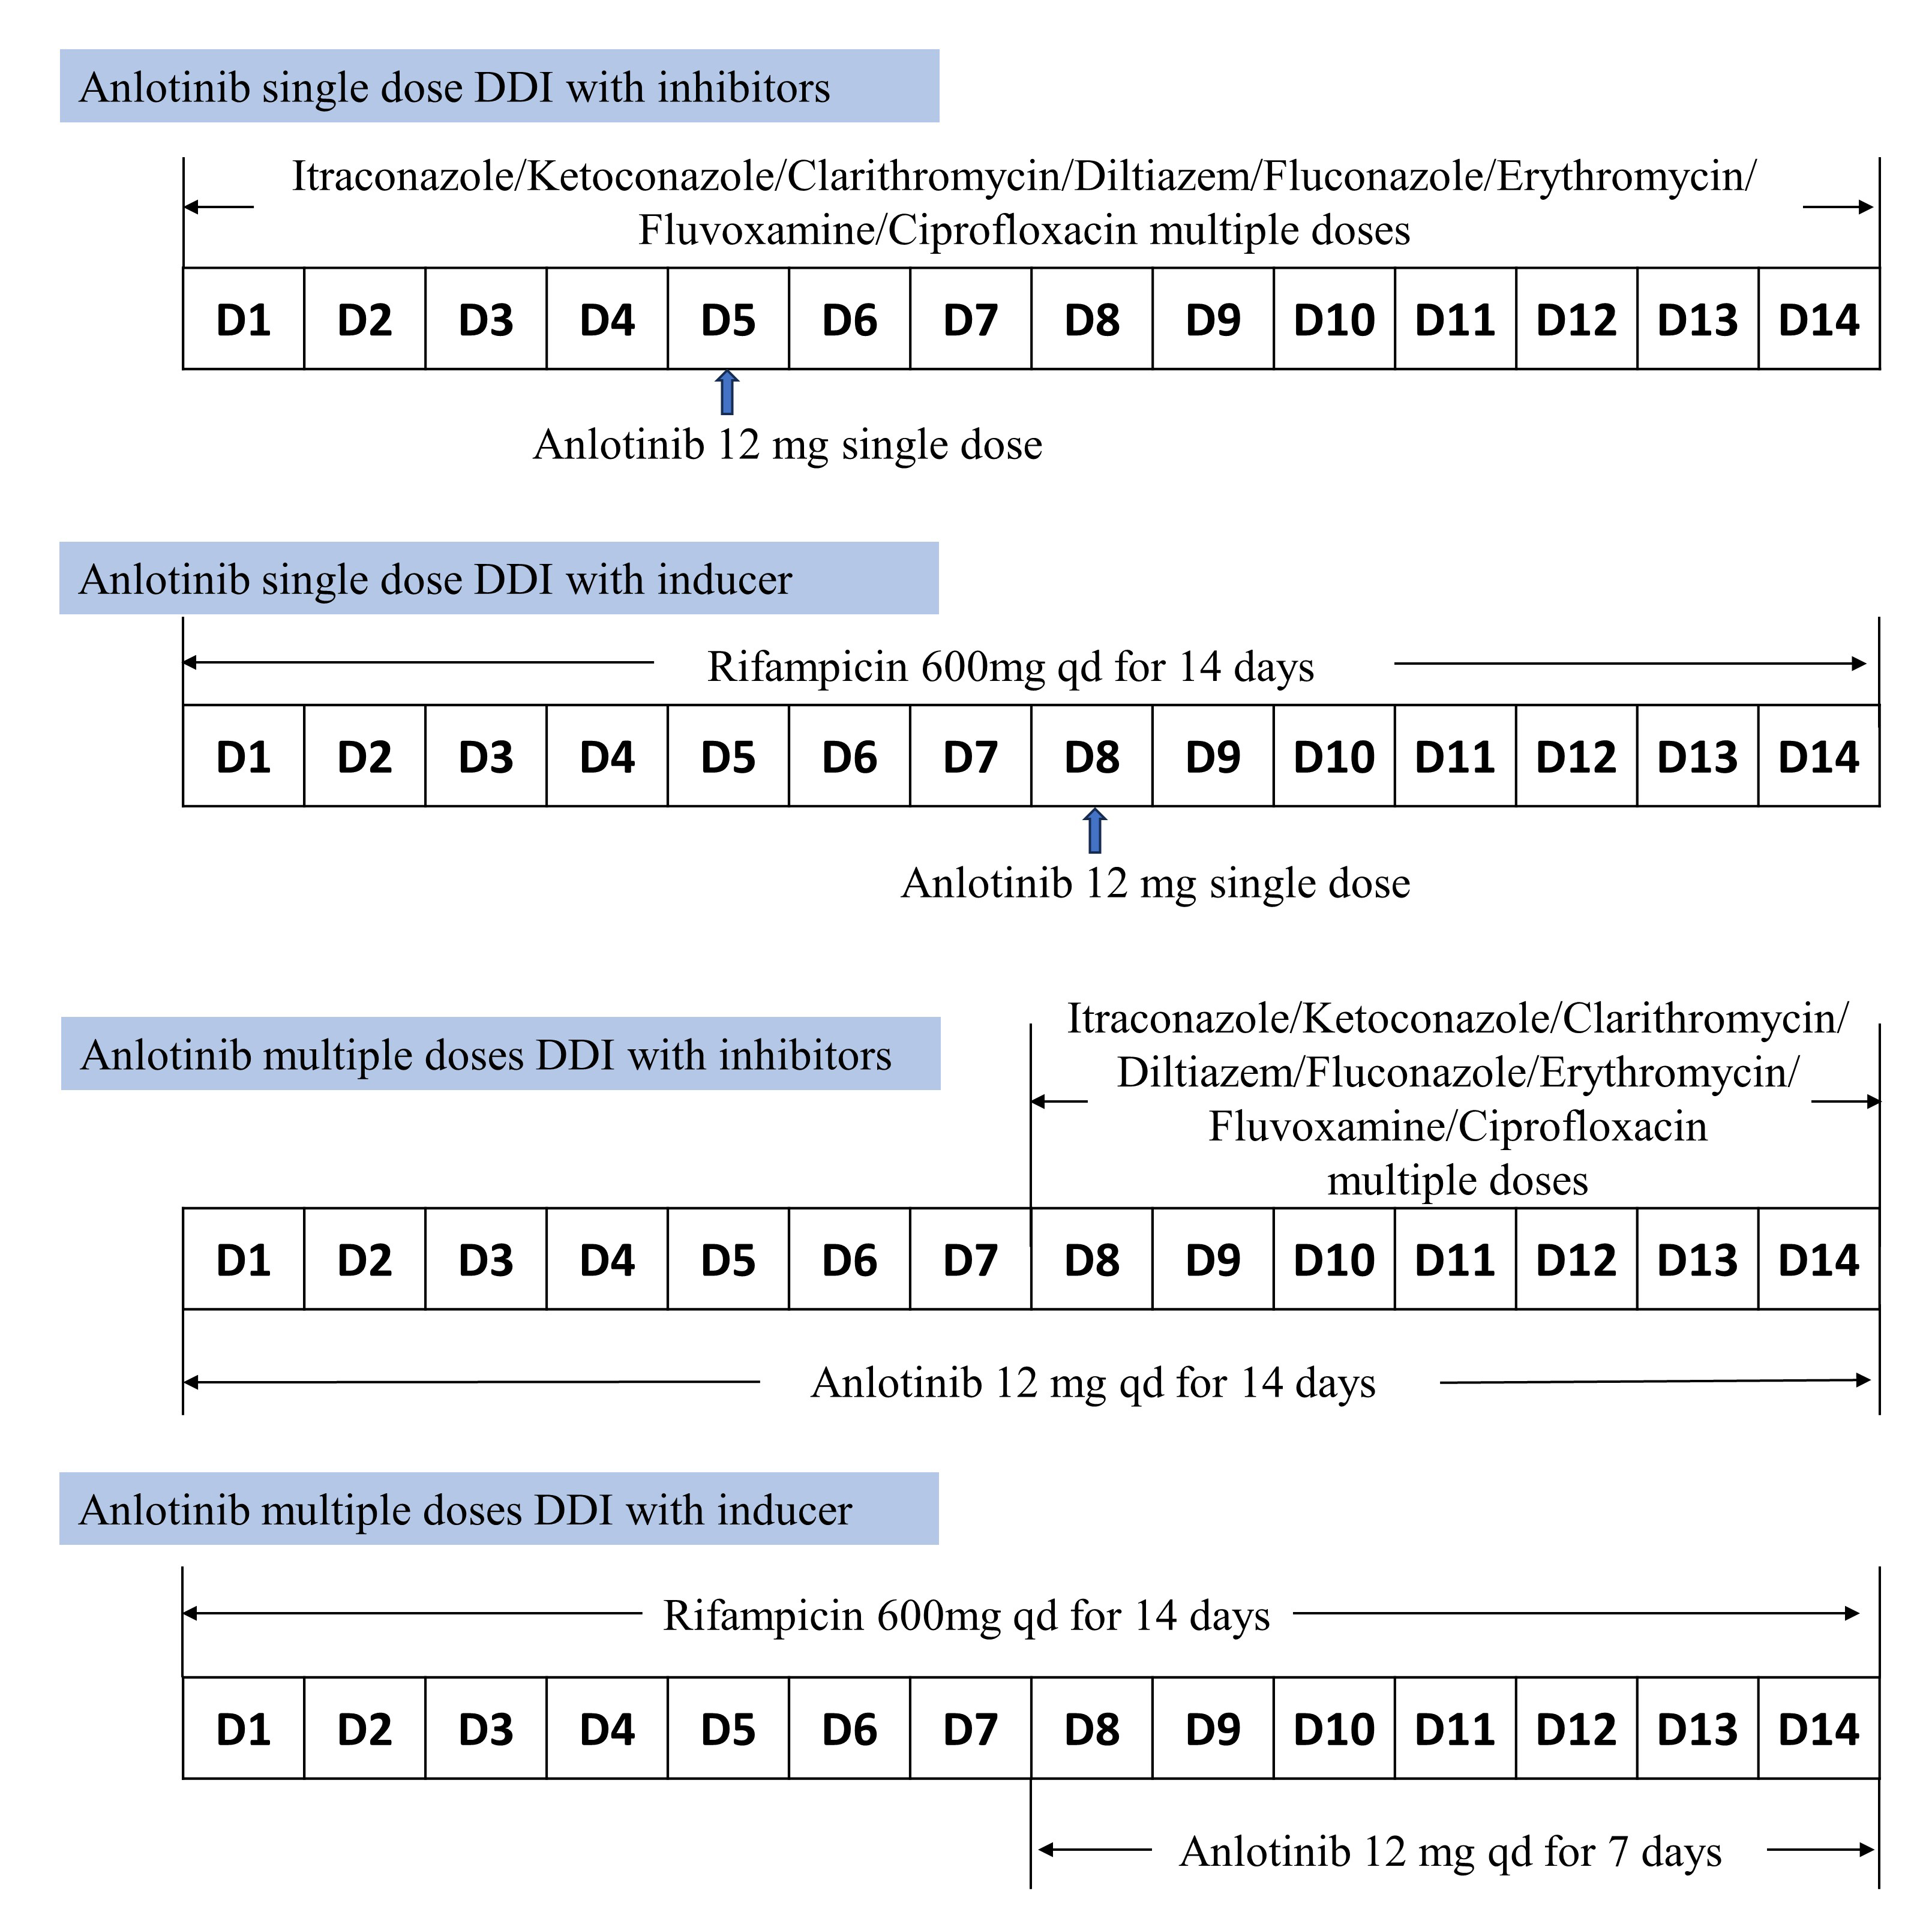
**

Figure S1. Co-administration regimens employed for predicting DDI between anlotinib and perpetrators.


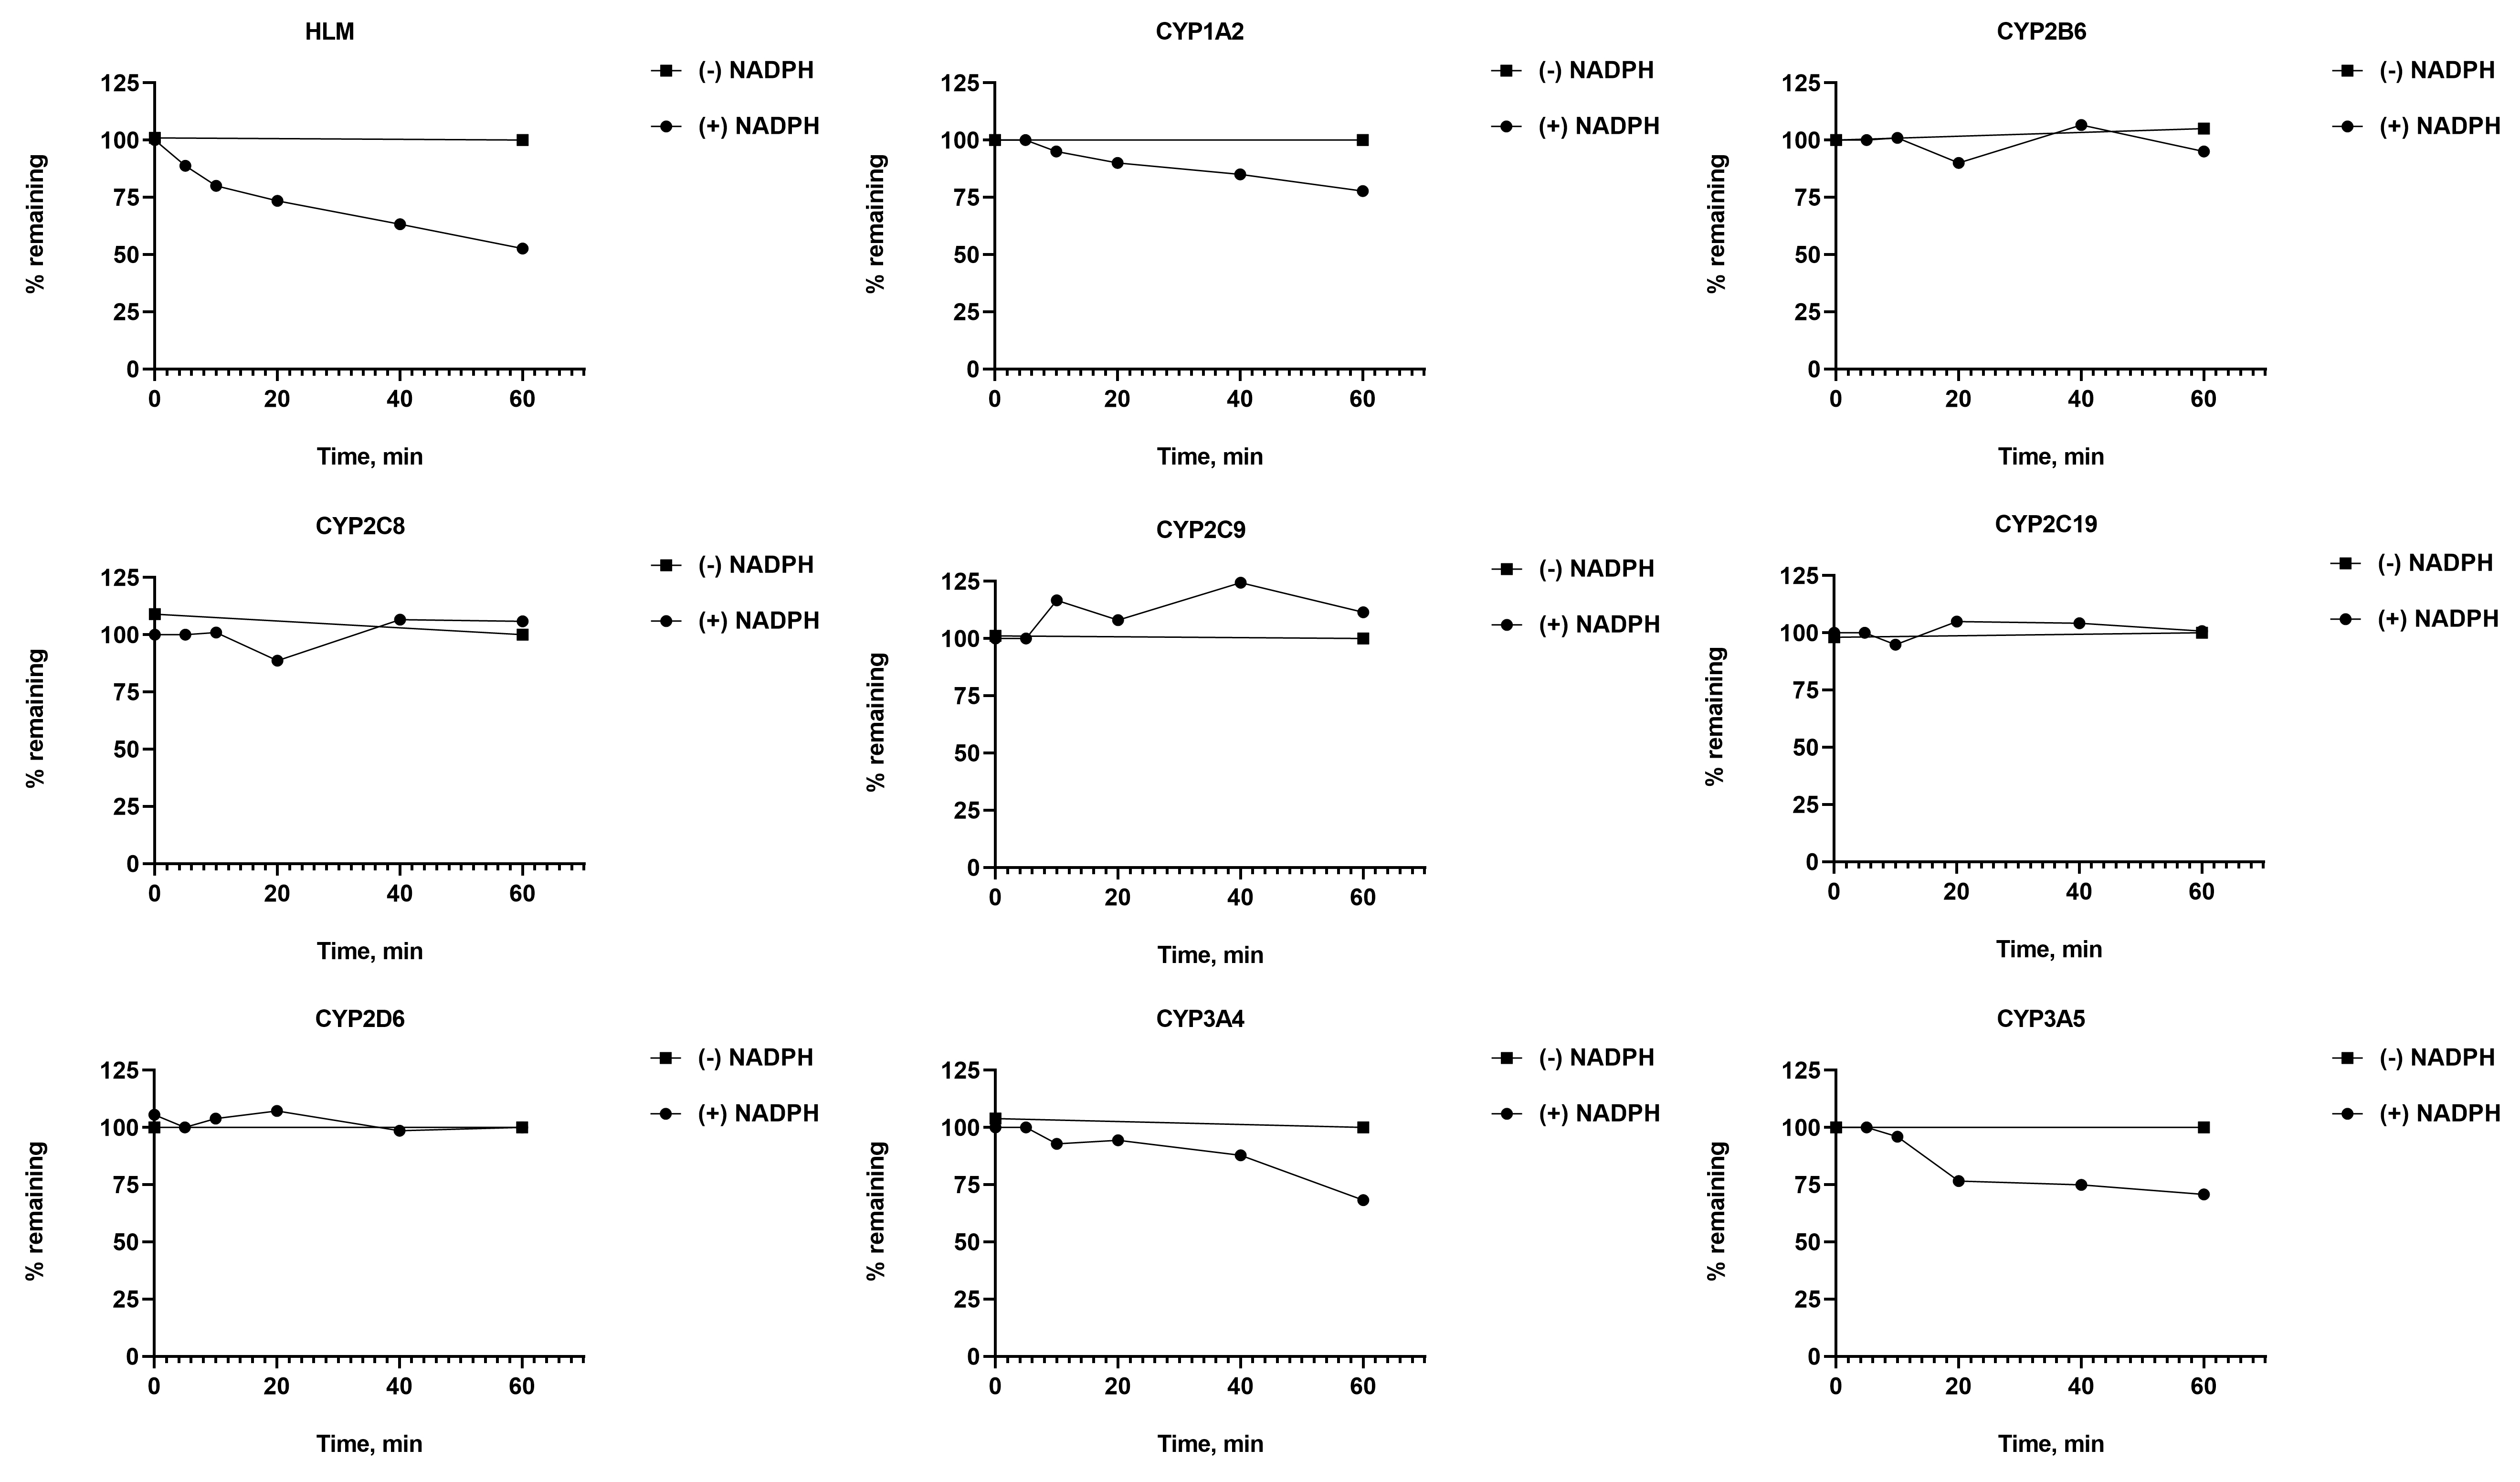


**Figure S2.** The metabolic stability of anlotinib in HLM and rhCYPs.


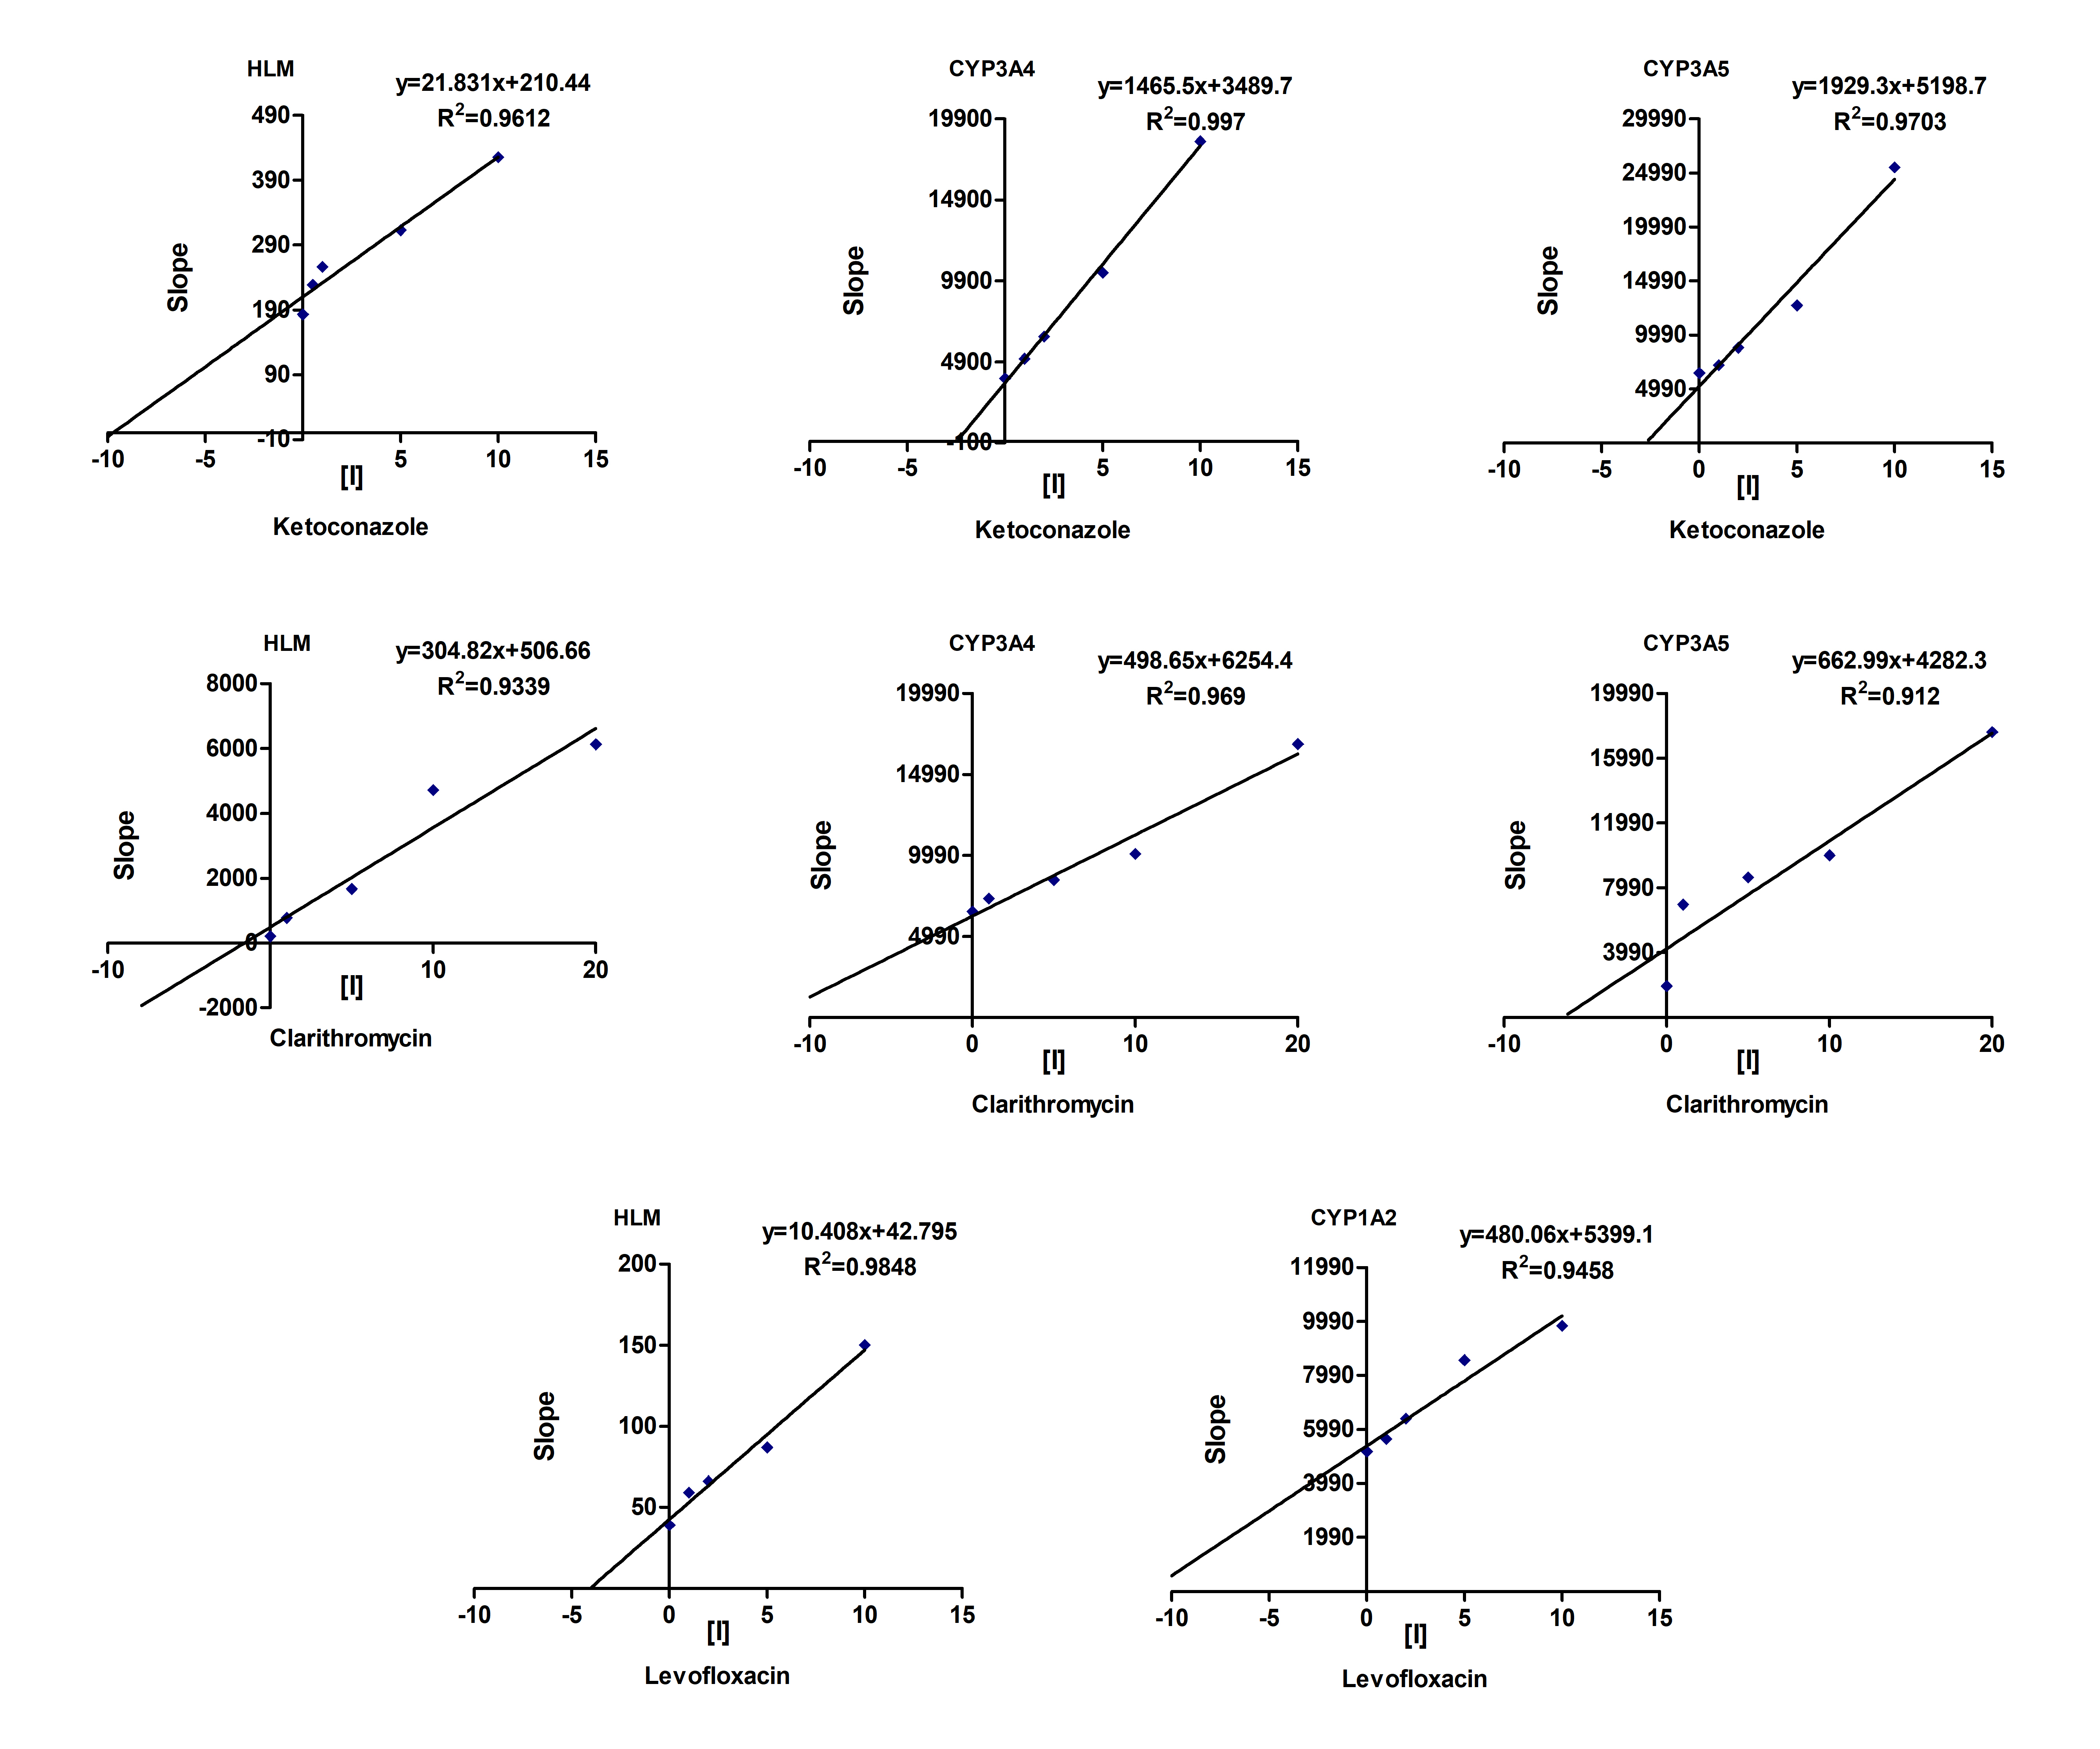


**Figure S3.** The linear regression analysis of the slope against the inhibitor concentration

**
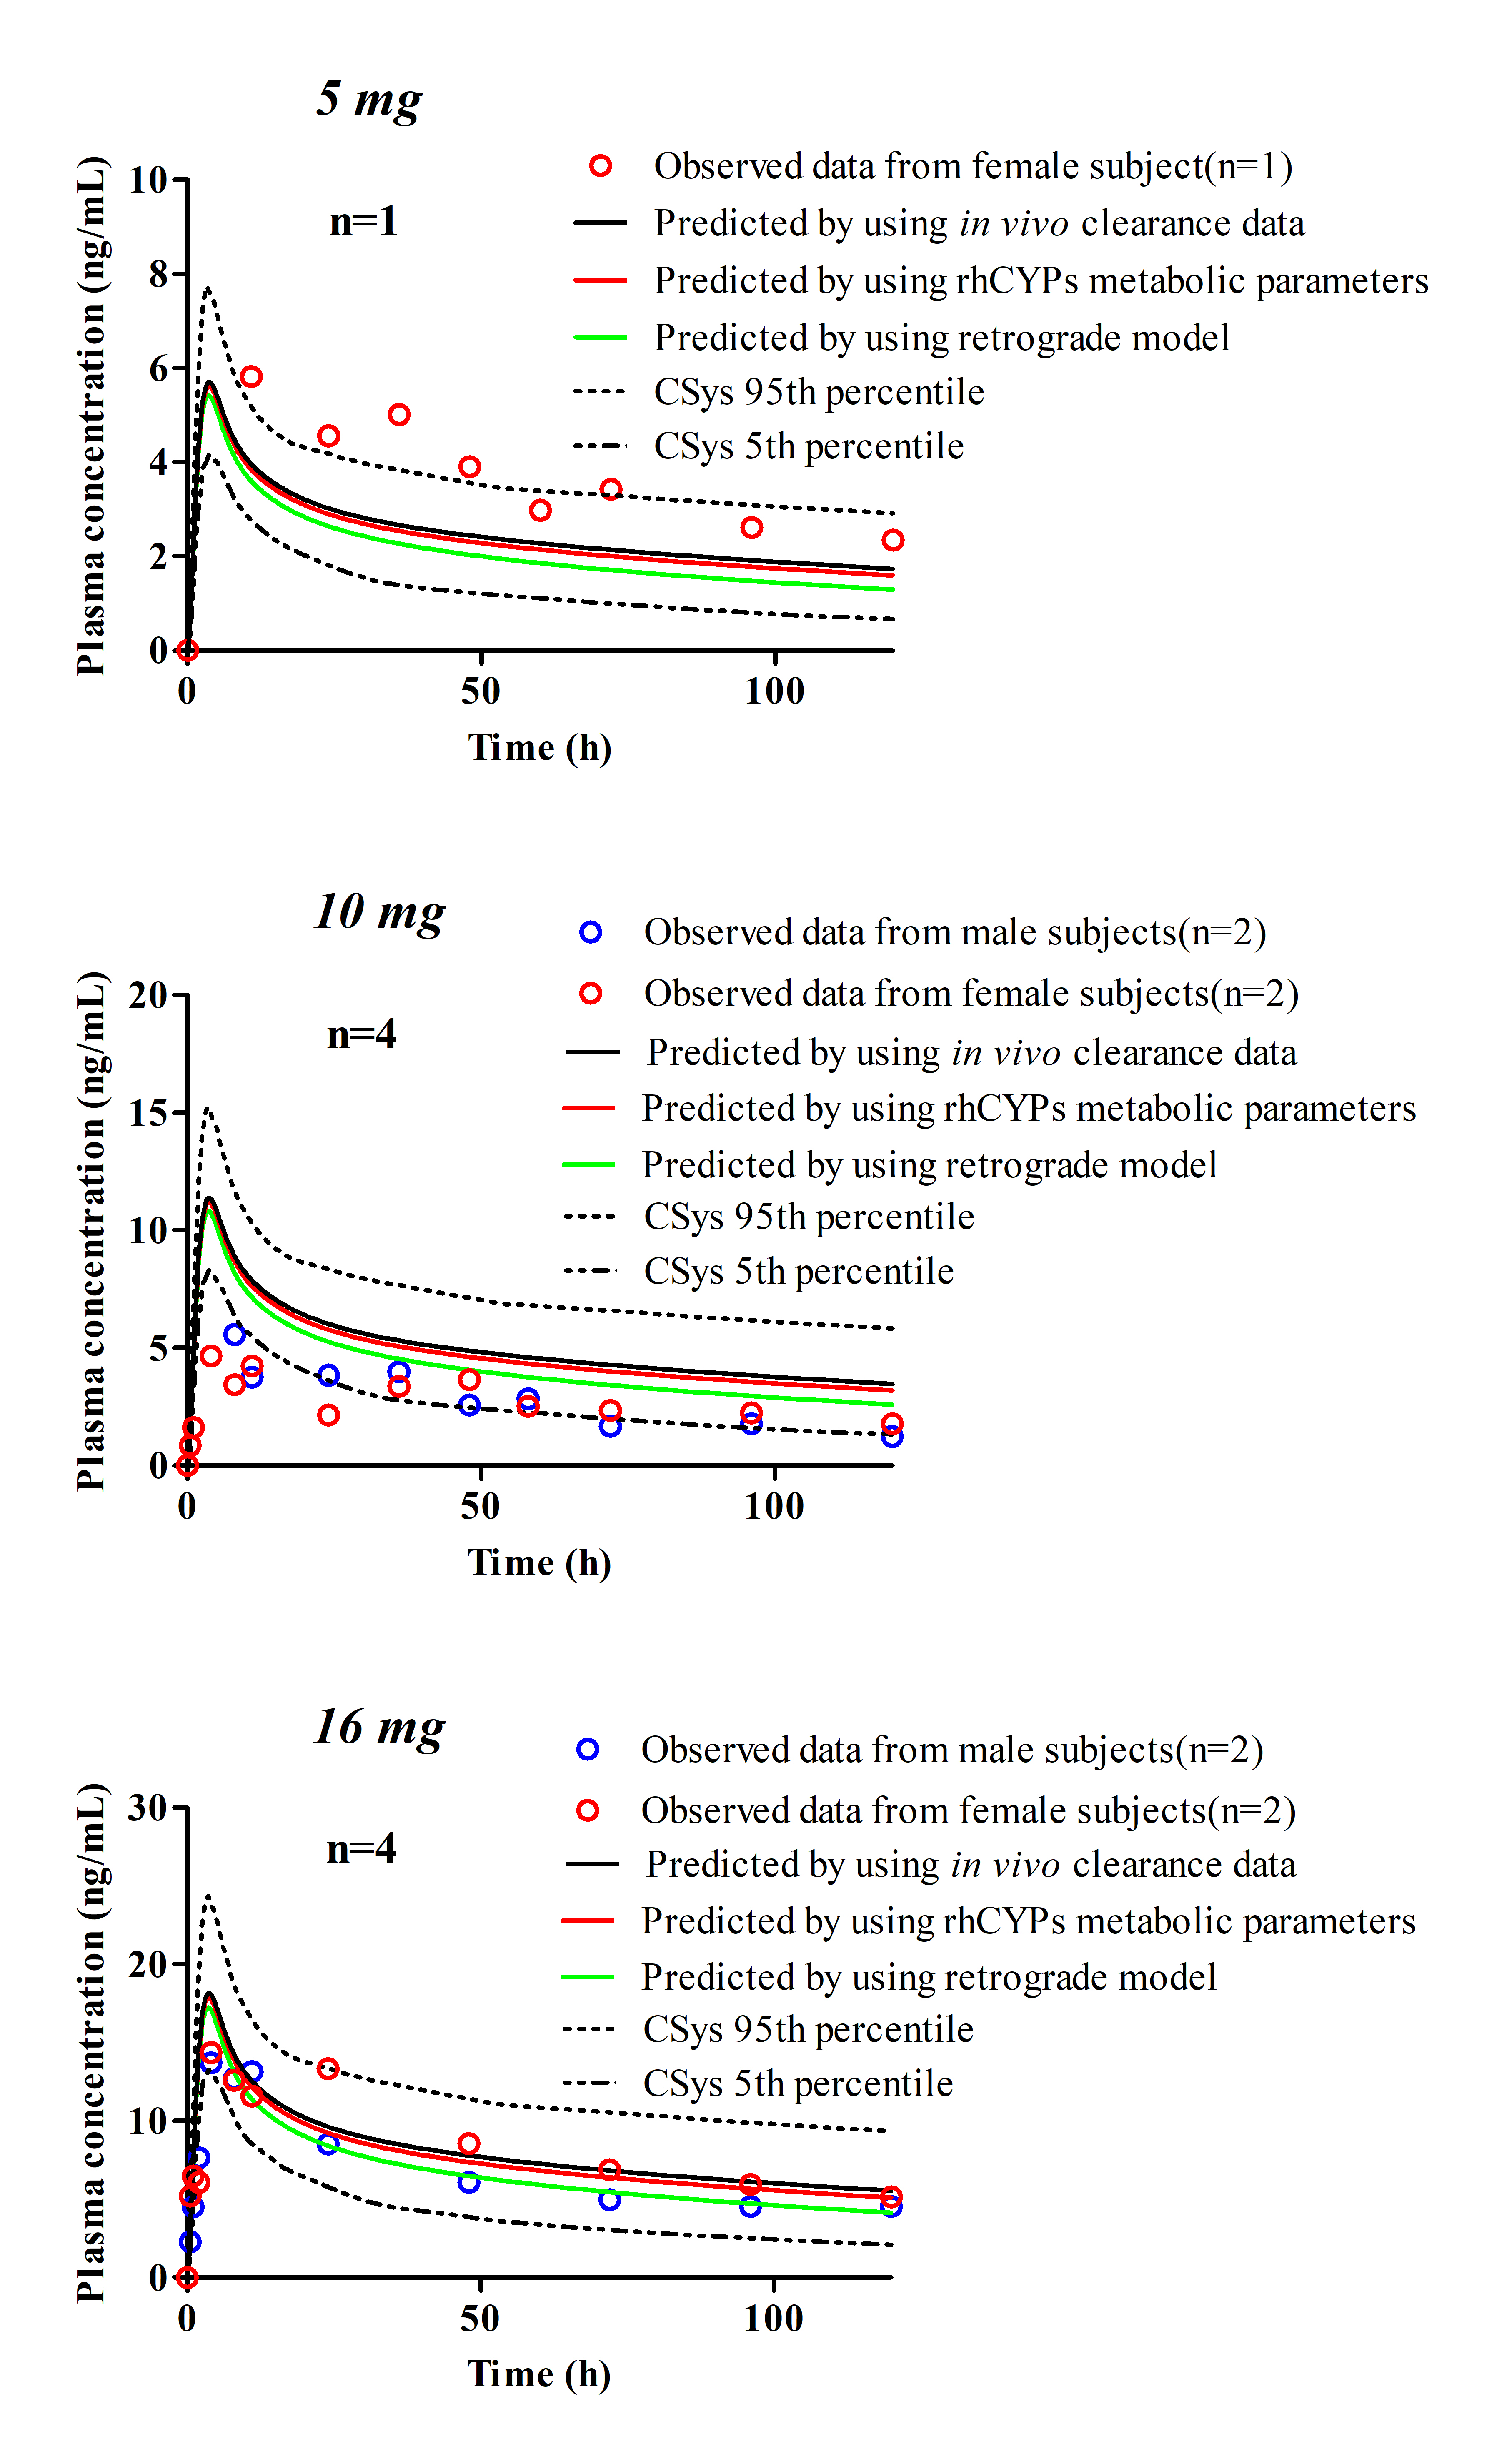
**

**Figure S4. The validation of the anlotinib PBPK model was compared using three different methods, including in vivo, rhCYPs and retrograde techniques after 5mg, 10mg or 16mg single dose.**





**Figure S5**. PBPK model-predicted plasma concentrations of anlotinib with and without (black lines) coadministration of strong CYP3A inhibitors in cancer patients using ISEF-approach. The PK profile of anlotinib coadministration with inhibitors with default Ki values (red line) and experimentally obtained Ki (blue line).

**Reference**

1. Zhong CC, Chen F, Yang JL, et al. Pharmacokinetics and disposition of anlotinib, an oral tyrosine kinase inhibitor, in experimental animal species. *Acta Pharmacol Sin*. 2018;39(6):1048-1063. doi: 10.1038/aps.2017.199
2. Jin Z, He Q, Zhu X, Zhu M, et al. Application of physiologically based pharmacokinetic modelling for the prediction of drug-drug interactions involving anlotinib as a perpetrator of cytochrome P450 enzymes. *Basic Clin Pharmacol Toxicol*. 2022;130(5):592-605. doi: 10.1111/bcpt.13721
